# Supplementary material for: Stabilization of dimeric PYR/PYL/RCAR family members relieves abscisic acid-induced inhibition of seed germination
Source: PubMed Central journal article supplement — Nat Commun. 2024 Sep 14;15:8077. doi: 10.1038/s41467-024-52426-y (PMC11401921; doi:10.1038/s41467-024-52426-y), 2024-09-14
Supplement: 41467_2024_52426_MOESM3_ESM.pdf [file 41467_2024_52426_MOESM3_ESM.pdf]

## **Description of Additional Supplementary Files**

**Supplementary Data 1.** The binding free energy (kcal/mol) of compounds generated using AILDE.

**Supplementary Data 2.** The DEGs responsive to ABA relative to DMSO.

**Supplementary Data 3.** The DEGs responsive to DBSA relative to DMSO.

**Supplementary Data 4.** The GO analysis of DEGs responsive to both DBSA and ABA treatment relative to DMSO.

**Supplementary Data 5.** The GO analysis of unique DEGs responsive to ABA treatment relative to DMSO.

**Supplementary Data 6.** The GO analysis of unique DEGs responsive to DBSA treatment relative to DMSO.
